# Supplementary material for: Loss of DEPTOR in renal tubules protects against cisplatin-induced acute kidney injury
Source: PubMed Central journal article supplement (PMC5906659; doi:10.1038/s41419-018-0483-3), 2018-04-18

## Supplemental Materials

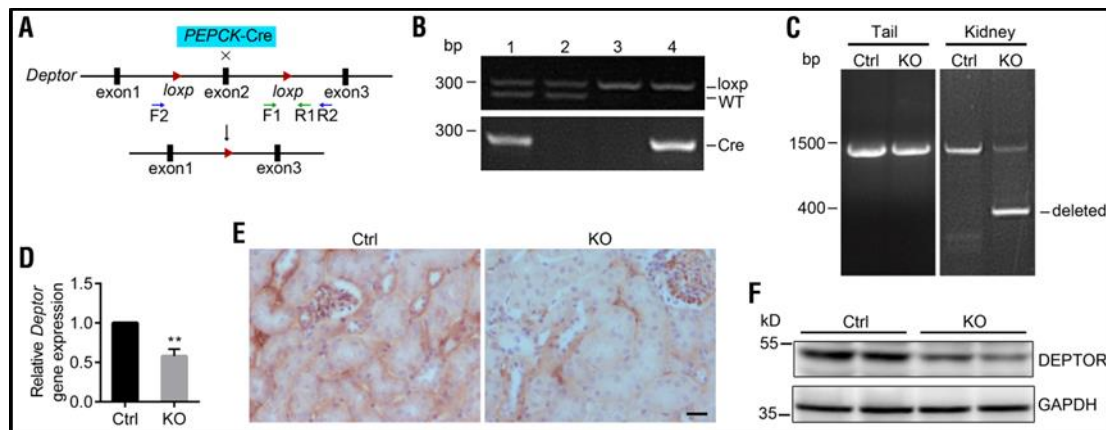

**Supplemental Figure 1. Generation of mice with *DEPTOR* specifically deleted in renal proximal tubules.** (A) Strategy for the production of *DEPTOR* cKO mice. *DEPTOR* flox mice were crossed with *PEPCK-Cre* mice to produce *DEPTOR* KO mice, in which the second exon of *DEPTOR* gene was deleted. F1/F2: forward primers for PCR identification, R1/R2: reverse primers for PCR identification. (B) Genotyping the F2 offspring by PCR with primers F1/R1 after mating the transgenic mice. M: DNA marker. (C) Identification of gene deletion in renal genomic DNA by PCR with primers F2/R2. Tail genomic DNA was used as the endogenous control. (D) qPCR analysis showed *DEPTOR* mRNA levels in the renal cortex of KO mice were obviously reduced compared with control mice. Data are expressed as mean values  $\pm$  SEM ( $n = 5$ ).  $**P < 0.01$ . (E) IHC staining showed *DEPTOR* expression was significantly reduced in renal proximal tubules of *DEPTOR* KO mice compared with control mice. Scale bar = 20  $\mu$ m. (F) Western blotting analysis showed *DEPTOR* expression in the renal cortex of KO mice was decreased.

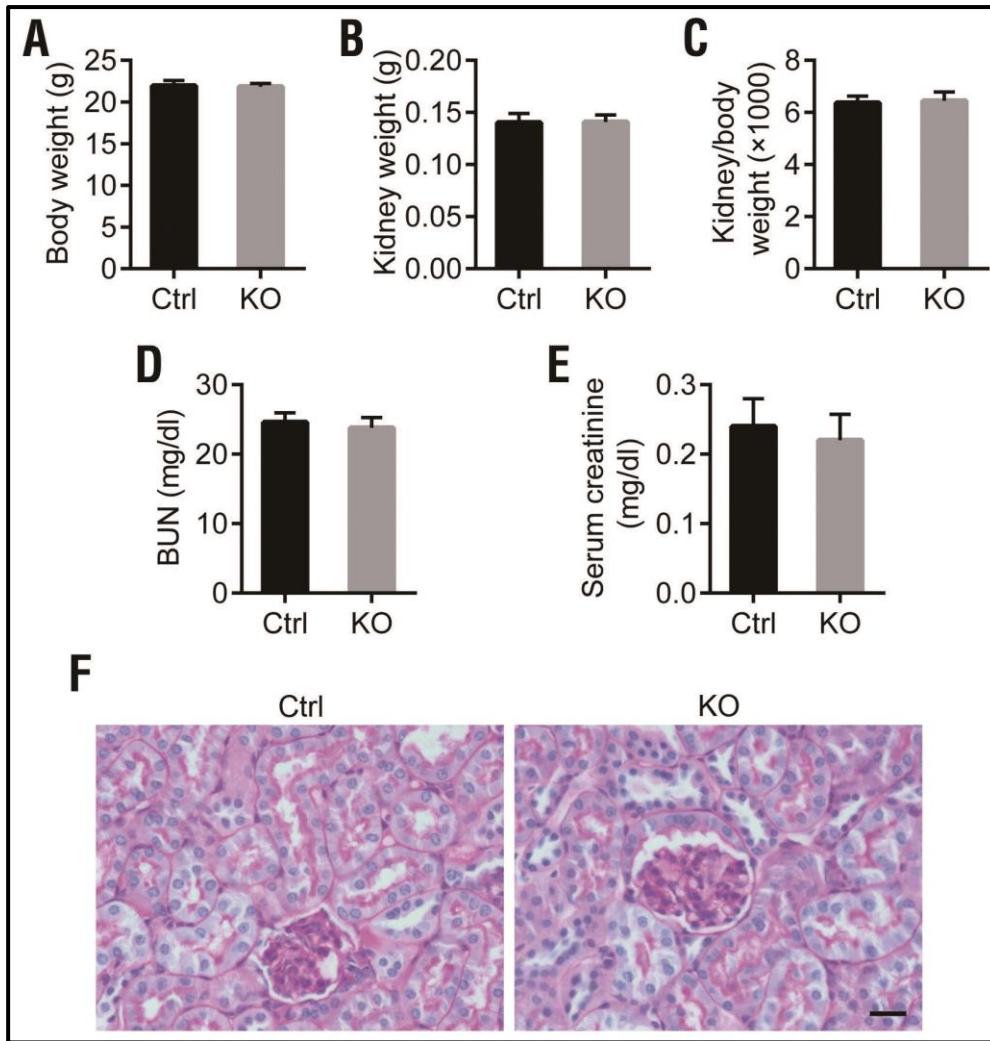

**Supplemental Figure 2. Normal renal functions and histology in *DEPTOR* KO mice under physiological conditions.** No significant difference was observed in bodyweight (A), kidney weight (B), kidney/body weight ratio (C), BUN (D), or serum creatinine (E) between *DEPTOR* KO and control (Ctrl) mice. BUN and creatinine were measured with the IDEXX Catalyst Chemistry Analyzer. (F) Kidney histology of paired mice detected with PAS staining. Mice were 8-12 weeks old. Scale bar = 20  $\mu\text{m}$ . Bars indicate mean values  $\pm$  SEM.  $n = 8$ .

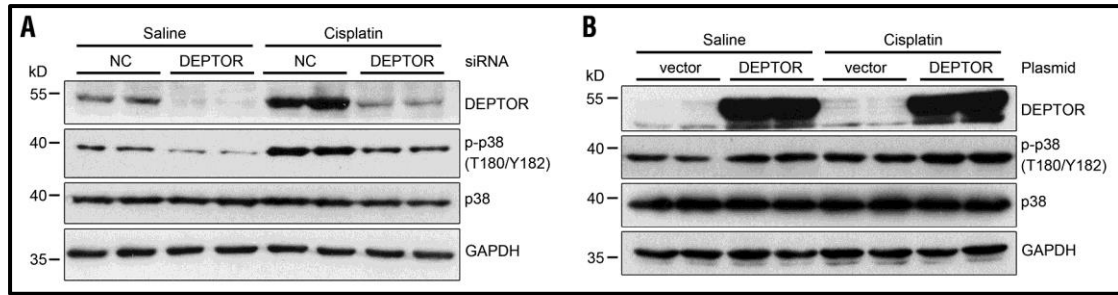

**Supplemental Figure 3. DEPTOR regulates p38 MAPK activity in HEK293 cells.**

(A) Immunoblotting showed that *DEPTOR* knockdown by siRNA inhibited p38 MAPK activity in HEK293 cells, with or without cisplatin treatment. In the cisplatin group, cells were incubated with 20  $\mu$ M cisplatin for 24 h, the same below. (B) Immunoblotting showed that *DEPTOR* overexpression enhanced p38 MAPK activity in HEK293 cells.

**Supplemental Table 1. Primers used for experiments**

| Gene                                | Forward primers(5'-3')          | Reverse primers(5'-3')           |
|-------------------------------------|---------------------------------|----------------------------------|
| <i>DEPTOR</i> -<br><i>F1/R1</i>     | GGAAGTGAAGACCTGTGAAGA<br>TAAGAG | CAGTCTAGAAAAGCAGATAACC<br>CAAGTA |
| <i>DEPTOR</i> -<br><i>F2/R2</i>     | CGTCGAGAAGTTCCTATTCCGA<br>AG    | GTGTGCCATTGAAATTTGTTACC<br>AT    |
| <i>PEPCK</i> -Cre                   | GCATAACCAGTGAAACAGCATT<br>GCTG  | GGACATGTTCAGGGATCGCCAG<br>GCG    |
| <i>DEPTOR</i> -<br>qPCR             | AGCAGAGAGAGCTGGAACGC            | CAGAGGCCTCCTTATGTTCA             |
| <i>Mouse Kim1</i>                   | ATGCCCATCTTCTGCTTGTC            | CCTTGTAGTTGTGGGTCTTCT            |
| <i>Mouse NGAL</i>                   | TGGCCCTGAGTGTCATGTG             | CTCTTGAGCTCATAGATGGTGC           |
| <i>Mouse TNF<math>\alpha</math></i> | CCTGTAGCCACGTCGTAG              | GGGAGTAGACAAGGTACAACCC           |
| <i>Mouse Gapdh</i>                  | TGTGTCCGTCGTGGATCTGA            | TTGCTGTTGAAAGTCGCAGGA            |
| <i>Human TNF<math>\alpha</math></i> | CCTCTCTCTAATCAGCCCTCTG          | GAGGACCTGGGAGTAGATGAG            |
| <i>Human Gapdh</i>                  | ACAACCTTGGTATCGTGGAAGG          | GCCATCACGCCACAGTTTC              |

**Supplemental Table 2. Antibodies used for experiments**

| Antibody                        | Vendor                    | Catalog number | Application | Working dilution for WB or (IF/IHC) |
|---------------------------------|---------------------------|----------------|-------------|-------------------------------------|
| Rabbit anti-DEPTOR              | Cell Signaling Technology | 11816          | WB          | 1:2000                              |
| Mouse anti-DEPTOR               | Santa Cruz Biotechnology  | sc-398169      | WB,IHC      | 1:2000 (1:100)                      |
| Rabbit anti-p-S6 (S235/236)     | Cell Signaling Technology | 4858           | WB, IHC,IF  | 1:2000 (1:200)                      |
| Mouse anti-S6                   | Santa Cruz Biotechnology  | sc-74459       | WB          | 1:2000                              |
| Rabbit anti-p-Akt (S473)        | Santa Cruz Biotechnology  | sc-7985-R      | WB          | 1:2000                              |
| Mouse anti-Akt                  | Cell Signaling Technology | 2920           | WB          | 1:2000                              |
| Rabbit anti-p-p38(T180/Y182)    | Cell Signaling Technology | 4511           | WB          | 1:2000                              |
| Rabbit anti-p38                 | Cell Signaling Technology | 8690           | WB          | 1:2000                              |
| Rabbit anti-Ki67                | Cell Signaling Technology | 9129           | IF          | 1:200                               |
| Rabbit anti-PARP                | Cell Signaling Technology | 9532           | WB          | 1:500                               |
| Rabbit anti- GAPDH              | Sungene                   | KM9002T        | WB          | 1:5000                              |
| Rabbit anti-p-ERK1/2(T202/Y204) | Cell Signaling Technology | 4370           | WB          | 1:2000                              |
| Rabbit anti-ERK1/2              | Cell Signaling Technology | 4695           | WB          | 1:2000                              |
| Rabbit anti-p-JNK(T183/Y185)    | Cell Signaling Technology | 4668           | WB          | 1:2000                              |
| Rabbit anti-JNK                 | Cell Signaling Technology | 8690           | WB          | 1:2000                              |
| Rabbit anti-p53                 | Abclonal                  | A3185          | WB          | 1:2000                              |
| Mouse anti-F4/80                | Santa Cruz Biotechnology  | sc-377009      | IF          | 1:50                                |

**Supplemental Table 3.** List of 46 genes with significant alteration in the mRNA level in the renal cortex of the *DEPTOR*-cKO mice vs that of the control mice under physiological condition by transcriptomic sequencing and screening assay.

| Gene     | log <sub>2</sub> (Fold change) | Description                                                            |
|----------|--------------------------------|------------------------------------------------------------------------|
| Cyp2b10  | -4.01                          | cytochrome P450, family 2, subfamily b, polypeptide 10                 |
| Ccl28    | -3.68                          | chemokine (C-C motif) ligand 28                                        |
| Rnf180   | -3.41                          | ring finger protein 180                                                |
| Rn7sk    | -3.25                          | RNA, 7SK, nuclear                                                      |
| Rmrp     | -3.02                          | RNA component of mitochondrial RNAase P                                |
| Hsd11b1  | -2.81                          | hydroxysteroid 11-beta dehydrogenase 1                                 |
| Ctxn3    | -2.80                          | cortixin 3                                                             |
| Slco1a1  | -2.73                          | solute carrier organic anion transporter family, member 1a1            |
| Srd5a2   | -2.61                          | steroid 5 alpha-reductase 2                                            |
| Acsm3    | -2.59                          | acyl-CoA synthetase medium-chain family member 3                       |
| Cyp4a12a | -2.56                          | cytochrome P450, family 4, subfamily a, polypeptide 12a                |
| Rpph1    | -2.48                          | ribonuclease P RNA component H1                                        |
| Hapln1   | -2.36                          | hyaluronan and proteoglycan link protein 1                             |
| Kif20b   | -2.34                          | kinesin family member 20B                                              |
| Eri2     | -2.32                          | exoribonuclease 2                                                      |
| Pik3c2g  | -2.29                          | phosphatidylinositol 3-kinase, C2 domain containing, gamma polypeptide |
| Mir6236  | -2.25                          | microRNA 6236                                                          |
| Hprt     | -2.17                          | hypoxanthine guanine phosphoribosyl transferase                        |
| Zpld1    | -2.16                          | zona pellucida like domain containing 1                                |
| Mfsd2a   | -1.97                          | major facilitator superfamily domain containing 2A                     |
| Odc1     | -1.96                          | ornithine decarboxylase, structural 1                                  |
| Frzb     | -1.93                          | frizzled-related protein                                               |
| Ces2b    | -1.87                          | carboxyesterase 2B                                                     |
| Slc22a7  | -1.80                          | solute carrier family 22 (organic anion transporter), member 7         |
| Lipo1    | -1.72                          | lipase, member O1                                                      |
| Nr4a1    | -1.70                          | nuclear receptor subfamily 4, group A, member 1                        |
| Azgp1    | -1.66                          | alpha-2-glycoprotein 1, zinc                                           |
| Il34     | -1.66                          | interleukin 34                                                         |
| Egr1     | -1.63                          | early growth response 1                                                |
| Cxcl12   | -1.57                          | chemokine (C-X-C motif) ligand 12                                      |
| Ttbk1    | -1.55                          | tau tubulin kinase 1                                                   |
| Cd36     | -1.54                          | CD36 antigen                                                           |
| Ces2c    | -1.35                          | carboxylesterase 2C                                                    |
| Tnfsf10  | -1.26                          | tumor necrosis factor (ligand) superfamily, member 10                  |

|          |       |                                                                  |
|----------|-------|------------------------------------------------------------------|
| B4galt5  | -1.26 | UDP-Gal:betaGlcNAc beta 1,4-galactosyltransferase, polypeptide 5 |
| C1qtnf3  | -1.20 | C1q and tumor necrosis factor related protein 3                  |
| Scd1     | 1.35  | stearoyl-Coenzyme A desaturase 1                                 |
| ApoE     | 1.39  | apolipoprotein E                                                 |
| Pdk4     | 1.49  | pyruvate dehydrogenase kinase, isoenzyme 4                       |
| Cish     | 1.49  | cytokine inducible SH2-containing protein                        |
| Tma7     | 1.88  | translational machinery associated 7                             |
| B4galnt1 | 1.94  | beta-1,4-N-acetyl-galactosaminyl transferase 1                   |
| Kynu     | 2.30  | kynureninase (L-kynurenine hydrolase)                            |
| Cyp4a14  | 2.76  | cytochrome P450, family 4, subfamily a, polypeptide 14           |
| Prlr     | 3.14  | prolactin receptor                                               |
| Gpr112   | 3.70  | adhesion G protein-coupled receptor G4                           |

**Supplemental Figure 4.** Network for protein interactions among the 46 genes.

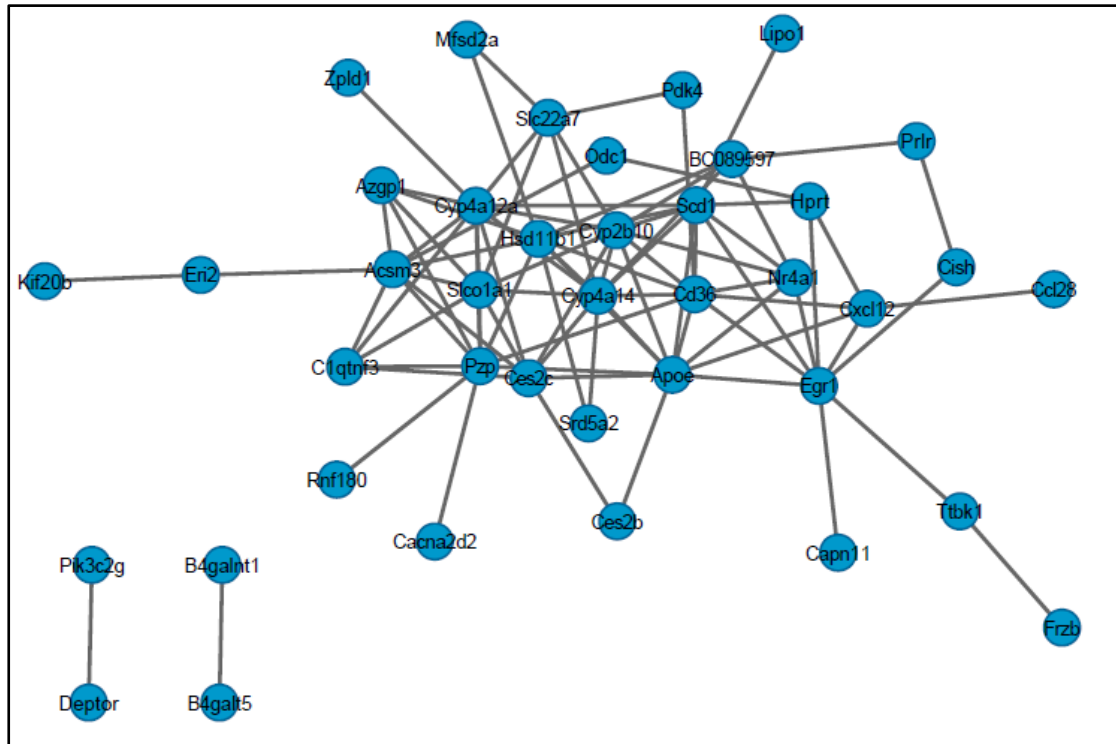

Supplement: 41419_2018_483_MOESM1_ESM.pdf [file 41419_2018_483_MOESM1_ESM.pdf]
